# Supplementary material for: LINE-1 hypomethylation in human hepatocellular carcinomas correlates with shorter overall survival and CIMP phenotype
Source: PLoS One. 2019 May 6;14(5):e0216374. doi: 10.1371/journal.pone.0216374 (PMC6502450; doi:10.1371/journal.pone.0216374)
Supplement: S3 Table — (XLSX) [file pone.0216374.s003.xlsx]

## Sheet: LINE1_HCC_HL
LINE-1
	HCC	CpG 1	CpG 2	CpG 3	CpG 4	CpG 5	CpG 6	CpG 7
	HCC 1	28	30	29	20	22	24	16
	HCC 2	43	40	38	27	43	26	18
	HCC 3	57	64	57	44	52	52	35
	HCC 4	74	79	67	51	59	56	37
	HCC 5	70	72	62	21	55	54	36
	HCC 6	31	33	32	24	26	28	19
	HCC 7	50	62	57	44	52	53	35
	HCC 8	69	74	63	48	45	60	36
	HCC 9	44	48	44	32	39	39	26
	HCC 10	21	20	19	13	16	13	7
	HCC 11	65	71	61	46	54	55	29
	HCC 12	29	35	35	23	33	30	22
	HCC 13	25	31	26	19	21	23	17
	HCC 14	70	77	68	51	58	57	40
	HCC 15	65	76	64	50	58	58	40
	HCC 16	68	74	63	38	54	55	37
	HCC 17	62	71	62	49	57	57	38
	HCC 18	54	66	59	45	53	53	39
	HCC 19	53	58	53	42	46	50	32
	HCC 20	32	5	31	22	25	25	16
	HCC 21	48	48	43	32	35	35	23
	HCC 22	67	72	62	47	54	53	34
	HCC 23	61	67	57	51	57	49	30
	HCC 24	70	76	63	49	58	55	36
	HCC 25	66	71	62	46	52	52	35
	HCC 26	40	45	41	29	29	33	22
	HCC 27	59	67	60	45	53	54	37
	HCC 28	47	48	43	34	37	38	24
	HCC 29	38	40	37	28	31	34	14
	HCC 30	42	54	48	38	43	46	31
	HCC 31	43	44	41	32	34	31	27
	HCC 32	56	67	58	45	55	54	37
	HCC 33	68	76	66	50	59	59	41
	HCC 35	62	72	62	44	52	54	38
	HCC 36	63	71	60	42	49	51	36
	HCC 37	59	71	62	44	35	54	40
	HCC 38	64	74	64	46	55	56	35
	HCC 39	64	73	63	45	53	54	39
	HCC 40	50	60	51	39	46	46	34
	HCC adj	CpG 1	CpG 2	CpG 3	CpG 4	CpG 5	CpG 6	CpG 7
	HCC adj 1	72	79	70	52	60	50	35
	HCC adj 2	67	75	64	49	57	58	39
	HCC adj 3	71	76	64	47	62	53	37
	HCC adj 4	65	69	59	46	52	51	32
	HCC adj 5	68	72	61	47	46	55	34
	HCC adj 6	69	75	61	48	56	53	33
	HCC adj 7	71	78	67	53	60	55	37
	HCC adj 8	70	77	66	50	58	57	39
	HCC adj 9	71	75	62	47	56	52	33
	HCC adj 10	69	75	62	47	56	53	34
	HCC adj 11	75	74	61	47	55	51	32
	HCC adj 12	66	72	62	46	52	47	30
	HCC adj 13	70	74	61	47	47	53	32
	HCC adj 14	29	30	28	21	23	25	16
	HCC adj 15	71	78	66	51	59	58	15
	HCC adj 16	63	75	65	51	58	59	40
	HCC adj 17	71	76	64	48	55	54	35
	HCC adj 18	64	71	63	48	54	55	37
	HCC adj 19	70	78	69	52	61	60	43
	HCC adj 20	57	63	55	41	46	46	33
	HCC adj 21	70	73	60	46	53	51	31
	HCC adj 22	72	77	66	50	56	53	36
	HCC adj 23	71	81	72	55	39	64	42
	HCC adj 24	71	76	63	49	55	56	36
	HCC adj 25	68	76	68	51	59	60	57
	HCC adj 26	71	75	61	47	55	49	34
	HCC adj 27	65	68	55	43	51	48	29
	HCC adj 28	68	72	59	45	54	45	30
	HCC adj 29	69	73	59	41	54	51	16
	HCC adj 30	69	74	60	46	55	51	32
	HCC adj 31	66	70	57	43	51	49	30
	HCC adj 32	67	73	59	45	54	51	31
	HCC adj 33	54	62	54	41	49	49	35
	HCC adj 34	50	55	47	34	40	40	28
	HCC adj 35	45	55	48	36	43	40	33
	HL	CpG 1	CpG 2	CpG 3	CpG 4	CpG 5	CpG 6	CpG 7
	HL1	64	76	67	45	57	58	38
	HL2	65	75	67	45	55	58	38
	HL3	65	76	67	46	56	80	39
	HL4	65	75	66	45	56	57	39
	HL5	66	78	68	48	58	54	41
